# Supplementary material for: Nausea and Vomiting during Early Pregnancy among Chinese Women and Its Association with Nutritional Intakes
Source: MDPI journal article supplement (doi:10.3390/nu15040933), 2023-02-13
Supplement: s1 [file s1]

Table S1 The food group classification standard

|                                  |                                                                                                                                                                                  |
|----------------------------------|----------------------------------------------------------------------------------------------------------------------------------------------------------------------------------|
| Cereals                          | Rice and its products (rice, rice flour, etc.); Wheat and its products (steamed bread, noodles, etc.);<br>Miscellaneous grains and other cereals (corn, millet, buckwheat, etc.) |
| Potatoes                         | Sweet potato, potato, taro, yam, etc.                                                                                                                                            |
| Fresh vegetables                 | Leaf vegetables, rhizomes, melons and eggplants, etc                                                                                                                             |
| Pickled and fermented vegetables | Such as pickled cucumber and fermented Chinese cabbage                                                                                                                           |
| Mushroom and algae               | Mushrooms ( <i>Lentinus edodes</i> , <i>Hericium erinaceus</i> , etc.); Agaric, tremella, etc; Kelp; Laver;                                                                      |
| Soybeans and their products      | Soybean, bean curd, bean curd, soybean milk, etc                                                                                                                                 |
| Nuts and seeds                   | Walnuts, melon seeds, peanuts, etc                                                                                                                                               |
| Fruits                           | Apple, orange, strawberry, papaya, banana, etc                                                                                                                                   |
| Poultry meat                     | Pork, beef, mutton, donkey meat, etc                                                                                                                                             |
| Livestock meat                   | Chicken, duck, goose, etc                                                                                                                                                        |
| Aquatic products                 | Fish, shrimp, shellfish, crab, etc                                                                                                                                               |
| Eggs                             | Eggs, duck eggs, preserved eggs, etc                                                                                                                                             |
| Dairy products                   | Pure milk, yoghurt, milk powder, other dairy products                                                                                                                            |
| Soups                            | Broth, bone soup, fish soup, etc                                                                                                                                                 |
| Snacks and beverages             | Beverages, tea, coffee, etc;<br>Cake (cake, biscuit, Chinese dessert, etc.); Candy candies; Chocolates; Puffed food; Other snacks                                                |

Table S2 Results of multiple regression model with daily nutrient intake as the dependent variable

| (a) Energy(kcal)                 |                                          |          |             |             |            |       |
|----------------------------------|------------------------------------------|----------|-------------|-------------|------------|-------|
| Variables                        |                                          | $\beta$  | 95% CI      |             | Wald value | P     |
|                                  |                                          |          | Lower Limit | Upper Limit |            |       |
| NVP group                        | NVP                                      | -299.271 | -510.817    | -87.725     | 7.688      | 0.006 |
|                                  | Non-NVP                                  | Ref.     |             |             |            |       |
| Age (years)                      | < 30                                     | 6.041    | -170.874    | 182.955     | .004       | 0.947 |
|                                  | $\geq 30$                                | Ref.     |             |             |            |       |
| Education                        | Junior high school or below              | -190.786 | -431.161    | 49.589      | 2.420      | 0.120 |
|                                  | High school / technical secondary school | -36.673  | -234.606    | 161.259     | .132       | 0.716 |
|                                  | College degree or above                  | Ref.     |             |             |            |       |
| Family monthly per capita income | < 5000                                   | -154.885 | -386.666    | 76.897      | 1.715      | 0.190 |
|                                  | 5000–9999                                | -194.578 | -411.936    | 22.781      | 3.078      | 0.079 |
|                                  | $\geq 10000$                             | Ref.     |             |             |            |       |
| Cities                           | First-tier                               | -151.112 | -392.010    | 89.786      | 1.512      | 0.219 |
|                                  | New first-tier                           | -308.594 | -537.444    | -79.743     | 6.985      | 0.008 |
|                                  | Second-tier                              | -40.524  | -263.342    | 182.294     | .127       | 0.721 |
|                                  | Third- or fourth-tier                    | Ref.     |             |             |            |       |
| Pre-pregnancy BMI                | Underweight                              | 186.418  | -126.009    | 498.845     | 1.368      | 0.242 |
|                                  | Normal                                   | 5.285    | -191.442    | 202.012     | .003       | 0.958 |
|                                  | Overweight/obesity                       | Ref.     |             |             |            |       |
| Gravidity                        | 1                                        | -68.986  | -283.932    | 145.960     | .396       | 0.529 |
|                                  | $\geq 2$                                 | Ref.     |             |             |            |       |
| Parity                           | 0                                        | -36.224  | -270.357    | 197.908     | .092       | 0.762 |
|                                  | $\geq 1$                                 | Ref.     |             |             |            |       |

| (b) Protein(g) |           |         |             |             |            |       |
|----------------|-----------|---------|-------------|-------------|------------|-------|
| Variables      |           | $\beta$ | 95% CI      |             | Wald value | P     |
|                |           |         | Lower Limit | Upper Limit |            |       |
| NVP group      | NVP       | -18.57  | -29.084     | -8.056      | 11.985     | 0.001 |
|                | Non-NVP   | Ref.    |             |             |            |       |
| Age (years)    | < 30      | 3.903   | -4.89       | 12.695      | 0.757      | 0.384 |
|                | $\geq 30$ | Ref.    |             |             |            |       |

|                                  |                                          |         |         |        |       |       |
|----------------------------------|------------------------------------------|---------|---------|--------|-------|-------|
| Education                        |                                          |         |         |        |       |       |
|                                  | Junior high school or below              | -15.428 | -27.375 | -3.482 | 6.407 | 0.011 |
|                                  | High school / technical secondary school | -2.991  | -12.828 | 6.846  | 0.355 | 0.551 |
|                                  | College degree or above                  | Ref.    |         |        |       |       |
| Family monthly per capita income |                                          |         |         |        |       |       |
|                                  | < 5000                                   | -5.351  | -16.87  | 6.168  | 0.829 | 0.363 |
|                                  | 5000–9999                                | -9.96   | -20.762 | 0.843  | 3.266 | 0.071 |
|                                  | ≥10000                                   | Ref.    |         |        |       |       |
| Cities                           |                                          |         |         |        |       |       |
|                                  | First-tier                               | 1.339   | -10.634 | 13.311 | 0.048 | 0.827 |
|                                  | New first-tier                           | -4.079  | -15.453 | 7.295  | 0.494 | 0.482 |
|                                  | Second-tier                              | 2.77    | -8.304  | 13.843 | 0.24  | 0.624 |
|                                  | Third- or fourth-tier                    | Ref.    |         |        |       |       |
| Pre-pregnancy BMI                |                                          |         |         |        |       |       |
|                                  | Underweight                              | 14.549  | -0.978  | 30.076 | 3.373 | 0.066 |
|                                  | Normal                                   | 1.619   | -8.158  | 11.396 | 0.105 | 0.745 |
|                                  | Overweight/obesity                       | Ref.    |         |        |       |       |
| Gravidity                        |                                          |         |         |        |       |       |
|                                  | 1                                        | 1.012   | -9.671  | 11.694 | 0.034 | 0.853 |
|                                  | ≥2                                       | Ref.    |         |        |       |       |
| Parity                           |                                          |         |         |        |       |       |
|                                  | 0                                        | -8.936  | -20.572 | 2.7    | 2.266 | 0.132 |
|                                  | ≥1                                       | Ref.    |         |        |       |       |

(c) Fat(g)

| Variables                        |                                          | $\beta$ | 95% CI      |             | Wald value | P     |
|----------------------------------|------------------------------------------|---------|-------------|-------------|------------|-------|
|                                  |                                          |         | Lower Limit | Upper Limit |            |       |
| NVP group                        |                                          |         |             |             |            |       |
|                                  | NVP                                      | -16.419 | -25.712     | -7.127      | 11.994     | 0.001 |
|                                  | Non-NVP                                  | Ref.    |             |             |            |       |
| Age (years)                      |                                          |         |             |             |            |       |
|                                  | < 30                                     | 2.617   | -5.154      | 10.388      | 0.436      | 0.509 |
|                                  | ≥30                                      | Ref.    |             |             |            |       |
| Education                        |                                          |         |             |             |            |       |
|                                  | Junior high school or below              | -10.524 | -21.082     | 0.035       | 3.816      | 0.051 |
|                                  | High school / technical secondary school | -6.665  | -15.360     | 2.029       | 2.258      | 0.133 |
|                                  | College degree or above                  | Ref.    |             |             |            |       |
| Family monthly per capita income |                                          |         |             |             |            |       |
|                                  | < 5000                                   | -6.556  | -16.737     | 3.625       | 1.593      | 0.207 |
|                                  | 5000–9999                                | -5.370  | -14.918     | 4.177       | 1.215      | 0.270 |
|                                  | ≥10000                                   | Ref.    |             |             |            |       |
| Cities                           |                                          |         |             |             |            |       |
|                                  | First-tier                               | -14.101 | -24.683     | -3.520      | 6.822      | 0.009 |

|                   |                       |        |         |        |       |       |
|-------------------|-----------------------|--------|---------|--------|-------|-------|
|                   | New first-tier        | -3.591 | -13.644 | 6.461  | 0.490 | 0.484 |
|                   | Second-tier           | -8.332 | -18.120 | 1.455  | 2.784 | 0.095 |
|                   | Third- or fourth-tier | Ref.   |         |        |       |       |
| Pre-pregnancy BMI |                       |        |         |        |       |       |
|                   | Underweight           | 10.064 | -3.660  | 23.787 | 2.066 | 0.151 |
|                   | Normal                | 1.958  | -6.683  | 10.599 | 0.197 | 0.657 |
|                   | Overweight/obesity    | Ref.   |         |        |       |       |
| Gravidity         |                       |        |         |        |       |       |
|                   | 1                     | -3.028 | -12.470 | 6.413  | 0.395 | 0.530 |
|                   | ≥2                    | Ref.   |         |        |       |       |
| Parity            |                       |        |         |        |       |       |
|                   | 0                     | -3.703 | -13.987 | 6.582  | 0.498 | 0.480 |
|                   | ≥1                    | Ref.   |         |        |       |       |

(d) Carbohydrate(g)

| Variables                        |                                          | β       | 95% CI      |             | Wald value | P     |
|----------------------------------|------------------------------------------|---------|-------------|-------------|------------|-------|
|                                  |                                          |         | Lower Limit | Upper Limit |            |       |
| NVP group                        |                                          |         |             |             |            |       |
|                                  | NVP                                      | -25.641 | -57.720     | 6.438       | 2.454      | 0.117 |
|                                  | Non-NVP                                  | Ref.    |             |             |            |       |
| Age (years)                      |                                          |         |             |             |            |       |
|                                  | < 30                                     | -1.247  | -28.075     | 25.580      | 0.008      | 0.927 |
|                                  | ≥30                                      | Ref.    |             |             |            |       |
| Education                        |                                          |         |             |             |            |       |
|                                  | Junior high school or below              | -4.291  | -40.742     | 32.159      | 0.053      | 0.818 |
|                                  | High school / technical secondary school | 10.946  | -19.069     | 40.960      | 0.511      | 0.475 |
|                                  | College degree or above                  | Ref.    |             |             |            |       |
| Family monthly per capita income |                                          |         |             |             |            |       |
|                                  | < 5000                                   | -5.599  | -40.747     | 29.549      | 0.097      | 0.755 |
|                                  | 5000–9999                                | -20.172 | -53.133     | 12.788      | 1.439      | 0.230 |
|                                  | ≥10000                                   | Ref.    |             |             |            |       |
| Cities                           |                                          |         |             |             |            |       |
|                                  | First-tier                               | 0.337   | -36.193     | 36.867      | 0.000      | 0.986 |
|                                  | New first-tier                           | -49.674 | -84.377     | -14.971     | 7.871      | 0.005 |
|                                  | Second-tier                              | 15.830  | -17.958     | 49.619      | 0.843      | 0.358 |
|                                  | Third- or fourth-tier                    | Ref.    |             |             |            |       |
| Pre-pregnancy BMI                |                                          |         |             |             |            |       |
|                                  | Underweight                              | 22.582  | -24.794     | 69.959      | 0.873      | 0.350 |
|                                  | Normal                                   | 3.560   | -26.272     | 33.392      | 0.055      | 0.815 |
|                                  | Overweight/obesity                       | Ref.    |             |             |            |       |
| Gravidity                        |                                          |         |             |             |            |       |
|                                  | 1                                        | 4.391   | -28.203     | 36.986      | 0.070      | 0.792 |
|                                  | ≥2                                       | Ref.    |             |             |            |       |

|        |    |        |         |        |       |       |
|--------|----|--------|---------|--------|-------|-------|
| Parity | 0  | -5.513 | -41.017 | 29.992 | 0.093 | 0.761 |
|        | ≥1 | Ref.   |         |        |       |       |

(e) Dietary fiber(g)

| Variables                        |                                          | β      | 95% CI      |             | Wald value | P     |
|----------------------------------|------------------------------------------|--------|-------------|-------------|------------|-------|
|                                  |                                          |        | Lower Limit | Upper Limit |            |       |
| NVP group                        | NVP                                      | -2.561 | -5.248      | 0.126       | 3.489      | 0.062 |
|                                  | Non-NVP                                  | Ref.   |             |             |            |       |
| Age (years)                      | < 30                                     | -1.999 | -4.246      | 0.248       | 3.039      | 0.081 |
|                                  | ≥30                                      | Ref.   |             |             |            |       |
| Education                        | Junior high school or below              | -2.253 | -5.307      | 0.800       | 2.092      | 0.148 |
|                                  | High school / technical secondary school | 0.297  | -2.217      | 2.811       | 0.054      | 0.817 |
|                                  | College degree or above                  | Ref.   |             |             |            |       |
| Family monthly per capita income | < 5000                                   | 2.176  | -0.768      | 5.120       | 2.098      | 0.147 |
|                                  | 5000–9999                                | 0.476  | -2.285      | 3.237       | 0.114      | 0.735 |
|                                  | ≥10000                                   | Ref.   |             |             |            |       |
| Cities                           | First-tier                               | 0.753  | -2.307      | 3.813       | 0.232      | 0.630 |
|                                  | New first-tier                           | 1.573  | -1.334      | 4.480       | 1.124      | 0.289 |
|                                  | Second-tier                              | 1.676  | -1.154      | 4.507       | 1.347      | 0.246 |
|                                  | Third- or fourth-tier                    | Ref.   |             |             |            |       |
| Pre-pregnancy BMI                | Underweight                              | 4.303  | 0.334       | 8.271       | 4.516      | 0.034 |
|                                  | Normal                                   | 1.149  | -1.350      | 3.648       | 0.812      | 0.368 |
|                                  | Overweight/obesity                       | Ref.   |             |             |            |       |
| Gravidity                        | 1                                        | 0.466  | -2.265      | 3.196       | 0.112      | 0.738 |
|                                  | ≥2                                       | Ref.   |             |             |            |       |
| Parity                           | 0                                        | -0.067 | -3.041      | 2.907       | 0.002      | 0.965 |
|                                  | ≥1                                       | Ref.   |             |             |            |       |

(f) Cholesterol(mg)

| Variables |         | β       | 95% CI      |             | Wald value | P     |
|-----------|---------|---------|-------------|-------------|------------|-------|
|           |         |         | Lower Limit | Upper Limit |            |       |
| NVP group | NVP     | -87.567 | -197.351    | 22.216      | 2.444      | 0.118 |
|           | Non-NVP | Ref.    |             |             |            |       |

|                                  |                                          |          |          |         |       |       |
|----------------------------------|------------------------------------------|----------|----------|---------|-------|-------|
| Age (years)                      |                                          |          |          |         |       |       |
|                                  | < 30                                     | 86.634   | -5.177   | 178.446 | 3.420 | 0.064 |
|                                  | ≥30                                      | Ref.     |          |         |       |       |
| Education                        |                                          |          |          |         |       |       |
|                                  | Junior high school or below              | -136.780 | -261.525 | -12.035 | 4.618 | 0.032 |
|                                  | High school / technical secondary school | -138.208 | -240.927 | -35.490 | 6.954 | 0.008 |
|                                  | College degree or above                  | Ref.     |          |         |       |       |
| Family monthly per capita income |                                          |          |          |         |       |       |
|                                  | < 5000                                   | 10.220   | -110.066 | 130.505 | 0.028 | 0.868 |
|                                  | 5000–9999                                | 20.637   | -92.163  | 133.437 | 0.129 | 0.720 |
|                                  | ≥10000                                   | Ref.     |          |         |       |       |
| Cities                           |                                          |          |          |         |       |       |
|                                  | First-tier                               | 134.804  | 9.787    | 259.820 | 4.466 | 0.035 |
|                                  | New first-tier                           | 77.616   | -41.148  | 196.380 | 1.641 | 0.200 |
|                                  | Second-tier                              | 54.981   | -60.653  | 170.614 | 0.868 | 0.351 |
|                                  | Third- or fourth-tier                    | Ref.     |          |         |       |       |
| Pre-pregnancy BMI                |                                          |          |          |         |       |       |
|                                  | Underweight                              | 0.204    | -161.933 | 162.341 | 0.000 | 0.998 |
|                                  | Normal                                   | 32.570   | -69.524  | 134.663 | 0.391 | 0.532 |
|                                  | Overweight/obesity                       | Ref.     |          |         |       |       |
| Gravidity                        |                                          |          |          |         |       |       |
|                                  | 1                                        | 121.407  | 9.859    | 232.955 | 4.550 | 0.033 |
|                                  | ≥2                                       | Ref.     |          |         |       |       |
| Parity                           |                                          |          |          |         |       |       |
|                                  | 0                                        | -181.074 | -302.580 | -59.569 | 8.531 | 0.003 |
|                                  | ≥1                                       | Ref.     |          |         |       |       |

(g) Vitamin A(μgREA)

| Variables                        |                                          | β        | 95% CI      |             | Wald value | P     |
|----------------------------------|------------------------------------------|----------|-------------|-------------|------------|-------|
|                                  |                                          |          | Lower Limit | Upper Limit |            |       |
| NVP group                        |                                          |          |             |             |            |       |
|                                  | NVP                                      | -95.335  | -355.980    | 165.310     | 0.514      | 0.473 |
|                                  | Non-NVP                                  | Ref.     |             |             |            |       |
| Age (years)                      |                                          |          |             |             |            |       |
|                                  | < 30                                     | -127.423 | -345.399    | 90.552      | 1.313      | 0.252 |
|                                  | ≥30                                      | Ref.     |             |             |            |       |
| Education                        |                                          |          |             |             |            |       |
|                                  | Junior high school or below              | 122.025  | -174.140    | 418.189     | 0.652      | 0.419 |
|                                  | High school / technical secondary school | -27.907  | -271.778    | 215.965     | 0.050      | 0.823 |
|                                  | College degree or above                  | Ref.     |             |             |            |       |
| Family monthly per capita income |                                          |          |             |             |            |       |
|                                  | < 5000                                   | 15.651   | -269.926    | 301.229     | 0.012      | 0.914 |
|                                  | 5000–9999                                | -133.581 | -401.387    | 134.226     | 0.956      | 0.328 |

|                   |                       |          |          |         |       |       |
|-------------------|-----------------------|----------|----------|---------|-------|-------|
|                   | ≥10000                | Ref.     |          |         |       |       |
| Cities            |                       |          |          |         |       |       |
|                   | First-tier            | 42.130   | -254.679 | 338.940 | 0.077 | 0.781 |
|                   | New first-tier        | -27.571  | -309.536 | 254.394 | 0.037 | 0.848 |
|                   | Second-tier           | 214.505  | -60.028  | 489.038 | 2.345 | 0.126 |
|                   | Third- or fourth-tier | Ref.     |          |         |       |       |
| Pre-pregnancy BMI |                       |          |          |         |       |       |
|                   | Underweight           | -287.773 | -672.712 | 97.167  | 2.147 | 0.143 |
|                   | Normal                | -261.506 | -503.892 | -19.120 | 4.471 | 0.034 |
|                   | Overweight/obesity    | Ref.     |          |         |       |       |
| Gravidity         |                       |          |          |         |       |       |
|                   | 1                     | 93.244   | -171.591 | 358.078 | 0.476 | 0.490 |
|                   | ≥2                    | Ref.     |          |         |       |       |
| Parity            |                       |          |          |         |       |       |
|                   | 0                     | -163.617 | -452.091 | 124.856 | 1.236 | 0.266 |
|                   | ≥1                    | Ref.     |          |         |       |       |

(h) Thiamin(mg)

| Variables                        | β                                        | 95% CI      |             | Wald value | P           |
|----------------------------------|------------------------------------------|-------------|-------------|------------|-------------|
|                                  |                                          | Lower Limit | Upper Limit |            |             |
| NVP group                        |                                          |             |             |            |             |
|                                  | NVP                                      | -0.210      | -0.359      | -0.060     | 7.577 0.006 |
|                                  | Non-NVP                                  | Ref.        |             |            |             |
| Age (years)                      |                                          |             |             |            |             |
|                                  | < 30                                     | 0.051       | -0.073      | 0.176      | 0.651 0.420 |
|                                  | ≥30                                      | Ref.        |             |            |             |
| Education                        |                                          |             |             |            |             |
|                                  | Junior high school or below              | -0.234      | -0.404      | -0.064     | 7.291 0.007 |
|                                  | High school / technical secondary school | -0.073      | -0.213      | 0.066      | 1.060 0.303 |
|                                  | College degree or above                  | Ref.        |             |            |             |
| Family monthly per capita income |                                          |             |             |            |             |
|                                  | < 5000                                   | 0.004       | -0.160      | 0.168      | 0.002 0.962 |
|                                  | 5000–9999                                | -0.067      | -0.220      | 0.087      | 0.723 0.395 |
|                                  | ≥10000                                   | Ref.        |             |            |             |
| Cities                           |                                          |             |             |            |             |
|                                  | First-tier                               | 0.080       | -0.090      | 0.250      | 0.848 0.357 |
|                                  | New first-tier                           | 0.025       | -0.137      | 0.187      | 0.092 0.762 |
|                                  | Second-tier                              | 0.085       | -0.072      | 0.242      | 1.124 0.289 |
|                                  | Third- or fourth-tier                    | Ref.        |             |            |             |
| Pre-pregnancy BMI                |                                          |             |             |            |             |
|                                  | Underweight                              | 0.055       | -0.165      | 0.276      | 0.241 0.623 |
|                                  | Normal                                   | -0.027      | -0.166      | 0.112      | 0.146 0.703 |
|                                  | Overweight/obesity                       | Ref.        |             |            |             |

|           |    |        |        |        |       |       |
|-----------|----|--------|--------|--------|-------|-------|
| Gravidity | 1  | 0.059  | -0.093 | 0.211  | 0.581 | 0.446 |
|           | ≥2 | Ref.   |        |        |       |       |
| Parity    | 0  | -0.177 | -0.342 | -0.011 | 4.383 | 0.036 |
|           | ≥1 | Ref.   |        |        |       |       |

(i) Riboflavin(mg)

| Variables                        |                                          | $\beta$ | 95% CI      |             | Wald value | P       |
|----------------------------------|------------------------------------------|---------|-------------|-------------|------------|---------|
|                                  |                                          |         | Lower Limit | Upper Limit |            |         |
| NVP group                        | NVP                                      | -0.346  | -0.531      | -0.160      | 13.355     | < 0.001 |
|                                  | Non-NVP                                  | Ref.    |             |             |            |         |
| Age (years)                      | < 30                                     | 0.050   | -0.105      | 0.205       | 0.401      | 0.527   |
|                                  | ≥30                                      | Ref.    |             |             |            |         |
| Education                        | Junior high school or below              | -0.155  | -0.366      | 0.056       | 2.081      | 0.149   |
|                                  | High school / technical secondary school | -0.010  | -0.184      | 0.163       | 0.014      | 0.906   |
|                                  | College degree or above                  | Ref.    |             |             |            |         |
| Family monthly per capita income | < 5000                                   | 0.014   | -0.189      | 0.217       | 0.019      | 0.890   |
|                                  | 5000–9999                                | -0.001  | -0.192      | 0.189       | 0.000      | 0.990   |
|                                  | ≥10000                                   | Ref.    |             |             |            |         |
| Cities                           | First-tier                               | 0.039   | -0.172      | 0.250       | 0.130      | 0.718   |
|                                  | New first-tier                           | -0.013  | -0.214      | 0.187       | 0.017      | 0.896   |
|                                  | Second-tier                              | 0.103   | -0.092      | 0.299       | 1.077      | 0.299   |
|                                  | Third- or fourth-tier                    | Ref.    |             |             |            |         |
| Pre-pregnancy BMI                | Underweight                              | 0.040   | -0.234      | 0.313       | 0.080      | 0.777   |
|                                  | Normal                                   | -0.019  | -0.191      | 0.153       | 0.047      | 0.828   |
|                                  | Overweight/obesity                       | Ref.    |             |             |            |         |
| Gravidity                        | 1                                        | 0.153   | -0.036      | 0.341       | 2.518      | 0.113   |
|                                  | ≥2                                       | Ref.    |             |             |            |         |
| Parity                           | 0                                        | -0.223  | -0.429      | -0.018      | 4.556      | 0.033   |
|                                  | ≥1                                       | Ref.    |             |             |            |         |

(j) Niacin(mg)

| Variables |  | $\beta$ | 95% CI      |             | Wald value | P |
|-----------|--|---------|-------------|-------------|------------|---|
|           |  |         | Lower Limit | Upper Limit |            |   |



|                                  |                                          |        |        |        |       |       |
|----------------------------------|------------------------------------------|--------|--------|--------|-------|-------|
| NVP group                        |                                          |        |        |        |       |       |
|                                  | NVP                                      | -1.918 | -4.518 | 0.682  | 2.090 | 0.148 |
|                                  | Non-NVP                                  | Ref.   |        |        |       |       |
| Age (years)                      |                                          |        |        |        |       |       |
|                                  | < 30                                     | 0.255  | -1.920 | 2.429  | 0.053 | 0.818 |
|                                  | ≥30                                      | Ref.   |        |        |       |       |
| Education                        |                                          |        |        |        |       |       |
|                                  | Junior high school or below              | -3.582 | -6.536 | -0.628 | 5.648 | 0.017 |
|                                  | High school / technical secondary school | -1.771 | -4.204 | 0.661  | 2.037 | 0.154 |
|                                  | College degree or above                  | Ref.   |        |        |       |       |
| Family monthly per capita income |                                          |        |        |        |       |       |
|                                  | < 5000                                   | -2.880 | -5.728 | -0.031 | 3.926 | 0.048 |
|                                  | 5000–9999                                | -3.070 | -5.741 | -0.399 | 5.073 | 0.024 |
|                                  | ≥10000                                   | Ref.   |        |        |       |       |
| Cities                           |                                          |        |        |        |       |       |
|                                  | First-tier                               | 1.495  | -1.466 | 4.456  | 0.979 | 0.322 |
|                                  | New first-tier                           | 0.414  | -2.399 | 3.227  | 0.083 | 0.773 |
|                                  | Second-tier                              | 1.809  | -0.929 | 4.548  | 1.677 | 0.195 |
|                                  | Third- or fourth-tier                    | Ref.   |        |        |       |       |
| Pre-pregnancy BMI                |                                          |        |        |        |       |       |
|                                  | Underweight                              | 2.152  | -1.688 | 5.992  | 1.207 | 0.272 |
|                                  | Normal                                   | 0.508  | -1.910 | 2.926  | 0.169 | 0.681 |
|                                  | Overweight/obesity                       | Ref.   |        |        |       |       |
| Gravidity                        |                                          |        |        |        |       |       |
|                                  | 1                                        | 0.093  | -2.549 | 2.735  | 0.005 | 0.945 |
|                                  | ≥2                                       | Ref.   |        |        |       |       |
| Parity                           |                                          |        |        |        |       |       |
|                                  | 0                                        | -3.226 | -6.104 | -0.348 | 4.828 | 0.028 |
|                                  | ≥1                                       | Ref.   |        |        |       |       |

(k) Vitamin C(mg)

| Variables   | $\beta$                                  | 95% CI      |             | Wald value | P           |
|-------------|------------------------------------------|-------------|-------------|------------|-------------|
|             |                                          | Lower Limit | Upper Limit |            |             |
| NVP group   |                                          |             |             |            |             |
|             | NVP                                      | 4.603       | -32.283     | 41.489     | 0.060 0.807 |
|             | Non-NVP                                  | Ref.        |             |            |             |
| Age (years) |                                          |             |             |            |             |
|             | < 30                                     | 19.155      | -11.692     | 50.003     | 1.481 0.224 |
|             | ≥30                                      | Ref.        |             |            |             |
| Education   |                                          |             |             |            |             |
|             | Junior high school or below              | -24.951     | -66.863     | 16.962     | 1.361 0.243 |
|             | High school / technical secondary school | 12.578      | -21.934     | 47.090     | 0.510 0.475 |
|             | College degree or above                  | Ref.        |             |            |             |

|                                  |                       |        |         |        |             |
|----------------------------------|-----------------------|--------|---------|--------|-------------|
| Family monthly per capita income |                       |        |         |        |             |
|                                  | < 5000                | 8.539  | -31.875 | 48.953 | 0.171 0.679 |
|                                  | 5000–9999             | 18.418 | -19.481 | 56.317 | 0.907 0.341 |
|                                  | ≥10000                | Ref.   |         |        |             |
| Cities                           |                       |        |         |        |             |
|                                  | First-tier            | 11.292 | -30.712 | 53.296 | 0.278 0.598 |
|                                  | New first-tier        | 5.626  | -34.277 | 45.529 | 0.076 0.782 |
|                                  | Second-tier           | -4.982 | -43.833 | 33.870 | 0.063 0.802 |
|                                  | Third- or fourth-tier | Ref.   |         |        |             |
| Pre-pregnancy BMI                |                       |        |         |        |             |
|                                  | Underweight           | 6.583  | -47.893 | 61.058 | 0.056 0.813 |
|                                  | Normal                | 0.143  | -34.159 | 34.445 | 0.000 0.993 |
|                                  | Overweight/obesity    | Ref.   |         |        |             |
| Gravidity                        |                       |        |         |        |             |
|                                  | 1                     | 35.021 | -2.458  | 72.499 | 3.354 0.067 |
|                                  | ≥2                    | Ref.   |         |        |             |
| Parity                           |                       |        |         |        |             |
|                                  | 0                     | 4.603  | -32.283 | 41.489 | 0.060 0.807 |
|                                  | ≥1                    | Ref.   |         |        |             |

(I) Vitamin E(mg)

| Variables                        |                                          | $\beta$ | 95% CI      |             | Wald value | P     |
|----------------------------------|------------------------------------------|---------|-------------|-------------|------------|-------|
|                                  |                                          |         | Lower Limit | Upper Limit |            |       |
| NVP group                        |                                          |         |             |             |            |       |
|                                  | NVP                                      | -7.211  | -12.836     | -1.586      | 6.312      | 0.012 |
|                                  | Non-NVP                                  | Ref.    |             |             |            |       |
| Age (years)                      |                                          |         |             |             |            |       |
|                                  | < 30                                     | -2.027  | -6.731      | 2.677       | 0.713      | 0.398 |
|                                  | ≥30                                      | Ref.    |             |             |            |       |
| Education                        |                                          |         |             |             |            |       |
|                                  | Junior high school or below              | -1.033  | -7.425      | 5.358       | 0.100      | 0.751 |
|                                  | High school / technical secondary school | 1.252   | -4.011      | 6.515       | 0.217      | 0.641 |
|                                  | College degree or above                  | Ref.    |             |             |            |       |
| Family monthly per capita income |                                          |         |             |             |            |       |
|                                  | < 5000                                   | 2.779   | -3.384      | 8.942       | 0.781      | 0.377 |
|                                  | 5000–9999                                | 1.990   | -3.789      | 7.770       | 0.456      | 0.500 |
|                                  | ≥10000                                   | Ref.    |             |             |            |       |
| Cities                           |                                          |         |             |             |            |       |
|                                  | First-tier                               | -5.134  | -11.539     | 1.272       | 2.468      | 0.116 |
|                                  | New first-tier                           | 0.599   | -5.486      | 6.685       | 0.037      | 0.847 |
|                                  | Second-tier                              | -1.321  | -7.246      | 4.603       | 0.191      | 0.662 |
|                                  | Third- or fourth-tier                    | Ref.    |             |             |            |       |
| Pre-pregnancy BMI                |                                          |         |             |             |            |       |

|           |                    |        |        |        |       |       |
|-----------|--------------------|--------|--------|--------|-------|-------|
| Gravidity | Underweight        | 4.443  | -3.865 | 12.750 | 1.099 | 0.295 |
|           | Normal             | 1.288  | -3.943 | 6.519  | 0.233 | 0.629 |
|           | Overweight/obesity | Ref.   |        |        |       |       |
|           | 1                  | -2.526 | -8.242 | 3.189  | 0.751 | 0.386 |
|           | ≥2                 | Ref.   |        |        |       |       |
|           |                    |        |        |        |       |       |
| Parity    | 0                  | 1.801  | -4.424 | 8.027  | 0.322 | 0.571 |
|           | ≥1                 | Ref.   |        |        |       |       |
|           |                    |        |        |        |       |       |

(m) Folate(μgDFE)

| Variables                        |                                          | β       | 95% CI      |             | Wald value | P     |
|----------------------------------|------------------------------------------|---------|-------------|-------------|------------|-------|
|                                  |                                          |         | Lower Limit | Upper Limit |            |       |
| NVP group                        | NVP                                      | -36.848 | -89.045     | 15.348      | 1.914      | 0.166 |
|                                  | Non-NVP                                  | Ref.    |             |             |            |       |
| Age (years)                      | < 30                                     | -2.445  | -46.260     | 41.371      | 0.012      | 0.913 |
|                                  | ≥30                                      | Ref.    |             |             |            |       |
| Education                        | Junior high school or below              | -77.769 | -136.997    | -18.542     | 6.623      | 0.010 |
|                                  | High school / technical secondary school | -4.100  | -53.565     | 45.364      | 0.026      | 0.871 |
|                                  | College degree or above                  | Ref.    |             |             |            |       |
| Family monthly per capita income | < 5000                                   | 47.612  | -9.809      | 105.033     | 2.641      | 0.104 |
|                                  | 5000–9999                                | 17.261  | -36.771     | 71.293      | 0.392      | 0.531 |
|                                  | ≥10000                                   | Ref.    |             |             |            |       |
| Cities                           | First-tier                               | 37.382  | -22.307     | 97.070      | 1.507      | 0.220 |
|                                  | New first-tier                           | 15.162  | -41.820     | 72.144      | 0.272      | 0.602 |
|                                  | Second-tier                              | 5.577   | -49.691     | 60.844      | 0.039      | 0.843 |
|                                  | Third- or fourth-tier                    | Ref.    |             |             |            |       |
| Pre-pregnancy BMI                | Underweight                              | 70.644  | -6.501      | 147.789     | 3.221      | 0.073 |
|                                  | Normal                                   | 8.202   | -40.540     | 56.943      | 0.109      | 0.742 |
|                                  | Overweight/obesity                       | Ref.    |             |             |            |       |
| Gravidity                        | 1                                        | 30.457  | -22.987     | 83.900      | 1.248      | 0.264 |
|                                  | ≥2                                       | Ref.    |             |             |            |       |
| Parity                           | 0                                        | -64.431 | -122.606    | -6.256      | 4.712      | 0.030 |
|                                  | ≥1                                       | Ref.    |             |             |            |       |

(n) Calcium(mg)

| Variables                        |                                          | $\beta$  | 95% CI      |             | Wald value | P     |
|----------------------------------|------------------------------------------|----------|-------------|-------------|------------|-------|
|                                  |                                          |          | Lower Limit | Upper Limit |            |       |
| NVP group                        |                                          |          |             |             |            |       |
|                                  | NVP                                      | -200.839 | -327.178    | -74.500     | 9.708      | 0.002 |
|                                  | Non-NVP                                  | Ref.     |             |             |            |       |
| Age (years)                      |                                          |          |             |             |            |       |
|                                  | < 30                                     | 45.076   | -60.581     | 150.732     | 0.699      | 0.403 |
|                                  | $\geq 30$                                | Ref.     |             |             |            |       |
| Education                        |                                          |          |             |             |            |       |
|                                  | Junior high school or below              | -117.611 | -261.167    | 25.945      | 2.578      | 0.108 |
|                                  | High school / technical secondary school | 71.931   | -46.278     | 190.140     | 1.422      | 0.233 |
|                                  | College degree or above                  | Ref.     |             |             |            |       |
| Family monthly per capita income |                                          |          |             |             |            |       |
|                                  | < 5000                                   | -59.492  | -197.917    | 78.932      | 0.710      | 0.400 |
|                                  | 5000–9999                                | -77.307  | -207.117    | 52.504      | 1.362      | 0.243 |
|                                  | $\geq 10000$                             | Ref.     |             |             |            |       |
| Cities                           |                                          |          |             |             |            |       |
|                                  | First-tier                               | -37.045  | -180.913    | 106.824     | 0.255      | 0.614 |
|                                  | New first-tier                           | -101.006 | -237.679    | 35.667      | 2.098      | 0.147 |
|                                  | Second-tier                              | -24.039  | -157.109    | 109.032     | 0.125      | 0.723 |
|                                  | Third- or fourth-tier                    | Ref.     |             |             |            |       |
| Pre-pregnancy BMI                |                                          |          |             |             |            |       |
|                                  | Underweight                              | 196.669  | 10.082      | 383.255     | 4.268      | 0.039 |
|                                  | Normal                                   | 4.319    | -113.170    | 121.808     | 0.005      | 0.943 |
|                                  | Overweight/obesity                       | Ref.     |             |             |            |       |
| Gravidity                        |                                          |          |             |             |            |       |
|                                  | 1                                        | 48.721   | -79.648     | 177.091     | 0.553      | 0.457 |
|                                  | $\geq 2$                                 | Ref.     |             |             |            |       |
| Parity                           |                                          |          |             |             |            |       |
|                                  | 0                                        | -56.350  | -196.178    | 83.478      | 0.624      | 0.430 |
|                                  | $\geq 1$                                 | Ref.     |             |             |            |       |

(o) Phosphorus(mg)

| Variables   |           | $\beta$  | 95% CI      |             | Wald value | P       |
|-------------|-----------|----------|-------------|-------------|------------|---------|
|             |           |          | Lower Limit | Upper Limit |            |         |
| NVP group   |           |          |             |             |            |         |
|             | NVP       | -256.799 | -392.773    | -120.825    | 13.702     | < 0.001 |
|             | Non-NVP   | Ref.     |             |             |            |         |
| Age (years) |           |          |             |             |            |         |
|             | < 30      | 31.766   | -81.948     | 145.480     | 0.300      | 0.584   |
|             | $\geq 30$ | Ref.     |             |             |            |         |
| Education   |           |          |             |             |            |         |

|                                          |          |          |         |       |       |
|------------------------------------------|----------|----------|---------|-------|-------|
| Junior high school or below              | -186.219 | -340.723 | -31.715 | 5.580 | 0.018 |
| High school / technical secondary school | -36.801  | -164.024 | 90.423  | 0.321 | 0.571 |
| College degree or above                  | Ref.     |          |         |       |       |
| Family monthly per capita income         |          |          |         |       |       |
| < 5000                                   | -62.539  | -211.520 | 86.442  | 0.677 | 0.411 |
| 5000–9999                                | -100.610 | -240.320 | 39.100  | 1.992 | 0.158 |
| ≥10000                                   | Ref.     |          |         |       |       |
| Cities                                   |          |          |         |       |       |
| First-tier                               | 22.299   | -132.541 | 177.140 | 0.080 | 0.778 |
| New first-tier                           | -90.727  | -237.823 | 56.370  | 1.461 | 0.227 |
| Second-tier                              | 17.237   | -125.982 | 160.457 | 0.056 | 0.814 |
| Third- or fourth-tier                    | Ref.     |          |         |       |       |
| Pre-pregnancy BMI                        |          |          |         |       |       |
| Underweight                              | 190.025  | -10.791  | 390.841 | 3.440 | 0.064 |
| Normal                                   | 29.192   | -97.257  | 155.641 | 0.205 | 0.651 |
| Overweight/obesity                       | Ref.     |          |         |       |       |
| Gravidity                                |          |          |         |       |       |
| 1                                        | 60.434   | -77.725  | 198.594 | 0.735 | 0.391 |
| ≥2                                       | Ref.     |          |         |       |       |
| Parity                                   |          |          |         |       |       |
| 0                                        | -140.245 | -290.737 | 10.247  | 3.336 | 0.068 |
| ≥1                                       | Ref.     |          |         |       |       |

(p) Potassium(mg)

| Variables                                | $\beta$  | 95% CI      |             | Wald value | P     |
|------------------------------------------|----------|-------------|-------------|------------|-------|
|                                          |          | Lower Limit | Upper Limit |            |       |
| NVP group                                |          |             |             |            |       |
| NVP                                      | -462.701 | -843.736    | -81.665     | 5.665      | 0.017 |
| Non-NVP                                  | Ref.     |             |             |            |       |
| Age (years)                              |          |             |             |            |       |
| < 30                                     | -28.026  | -346.684    | 290.631     | 0.030      | 0.863 |
| ≥30                                      | Ref.     |             |             |            |       |
| Education                                |          |             |             |            |       |
| Junior high school or below              | -537.354 | -970.315    | -104.392    | 5.917      | 0.015 |
| High school / technical secondary school | -107.020 | -463.535    | 249.495     | 0.346      | 0.556 |
| College degree or above                  | Ref.     |             |             |            |       |
| Family monthly per capita income         |          |             |             |            |       |
| < 5000                                   | -49.486  | -466.970    | 367.998     | 0.054      | 0.816 |
| 5000–9999                                | -214.944 | -606.449    | 176.561     | 1.158      | 0.282 |
| ≥10000                                   | Ref.     |             |             |            |       |
| Cities                                   |          |             |             |            |       |
| First-tier                               | 272.708  | -161.197    | 706.613     | 1.517      | 0.218 |
| New first-tier                           | 56.263   | -355.940    | 468.467     | 0.072      | 0.789 |

|                   |                       |          |          |          |       |       |
|-------------------|-----------------------|----------|----------|----------|-------|-------|
| Pre-pregnancy BMI | Second-tier           | 133.621  | -267.717 | 534.960  | 0.426 | 0.514 |
|                   | Third- or fourth-tier | Ref.     |          |          |       |       |
|                   |                       |          |          |          |       |       |
| Gravidity         | Underweight           | 533.043  | -29.698  | 1095.784 | 3.447 | 0.063 |
|                   | Normal                | 182.978  | -171.365 | 537.322  | 1.024 | 0.311 |
|                   | Overweight/obesity    | Ref.     |          |          |       |       |
| Parity            | 1                     | 151.633  | -235.526 | 538.793  | 0.589 | 0.443 |
|                   | ≥2                    | Ref.     |          |          |       |       |
|                   |                       |          |          |          |       |       |
|                   | 0                     | -365.748 | -787.466 | 55.970   | 2.889 | 0.089 |
|                   | ≥1                    | Ref.     |          |          |       |       |
|                   |                       |          |          |          |       |       |

(q) Sodium(mg)

| Variables                                | $\beta$  | 95% CI      |             | Wald value | P     |
|------------------------------------------|----------|-------------|-------------|------------|-------|
|                                          |          | Lower Limit | Upper Limit |            |       |
| NVP group                                |          |             |             |            |       |
| NVP                                      | -235.671 | -803.668    | 332.325     | 0.661      | 0.416 |
| Non-NVP                                  | Ref.     |             |             |            |       |
| Age (years)                              |          |             |             |            |       |
| < 30                                     | 19.178   | -455.834    | 494.191     | 0.006      | 0.937 |
| $\geq 30$                                | Ref.     |             |             |            |       |
| Education                                |          |             |             |            |       |
| Junior high school or below              | 410.750  | -234.652    | 1056.152    | 1.556      | 0.212 |
| High school / technical secondary school | -405.684 | -937.130    | 125.761     | 2.238      | 0.135 |
| College degree or above                  | Ref.     |             |             |            |       |
| Family monthly per capita income         |          |             |             |            |       |
| < 5000                                   | -245.863 | -868.193    | 376.467     | 0.600      | 0.439 |
| 5000–9999                                | -95.971  | -679.575    | 487.633     | 0.104      | 0.747 |
| $\geq 10000$                             | Ref.     |             |             |            |       |
| Cities                                   |          |             |             |            |       |
| First-tier                               | -549.040 | -1195.848   | 97.767      | 2.768      | 0.096 |
| New first-tier                           | -379.287 | -993.745    | 235.172     | 1.464      | 0.226 |
| Second-tier                              | -75.688  | -673.950    | 522.574     | 0.061      | 0.804 |
| Third- or fourth-tier                    | Ref.     |             |             |            |       |
| Pre-pregnancy BMI                        |          |             |             |            |       |
| Underweight                              | 88.323   | -750.537    | 927.183     | 0.043      | 0.837 |
| Normal                                   | 260.792  | -267.416    | 789.001     | 0.936      | 0.333 |
| Overweight/obesity                       | Ref.     |             |             |            |       |
| Gravidity                                |          |             |             |            |       |
| 1                                        | 375.562  | -201.565    | 952.688     | 1.627      | 0.202 |
| $\geq 2$                                 | Ref.     |             |             |            |       |
| Parity                                   |          |             |             |            |       |

|    |          |          |         |       |       |
|----|----------|----------|---------|-------|-------|
| 0  | -212.796 | -841.437 | 415.846 | 0.440 | 0.507 |
| ≥1 | Ref.     |          |         |       |       |

(r) Magnesium(mg)

| Variables                                |  | β       | 95% CI      |             | Wald value | P     |
|------------------------------------------|--|---------|-------------|-------------|------------|-------|
|                                          |  |         | Lower Limit | Upper Limit |            |       |
| NVP group                                |  |         |             |             |            |       |
| NVP                                      |  | -40.536 | -88.597     | 7.526       | 2.733      | 0.098 |
| Non-NVP                                  |  | Ref.    |             |             |            |       |
| Age (years)                              |  |         |             |             |            |       |
| < 30                                     |  | -20.816 | -61.009     | 19.378      | 1.030      | 0.310 |
| ≥30                                      |  | Ref.    |             |             |            |       |
| Education                                |  |         |             |             |            |       |
| Junior high school or below              |  | -61.144 | -115.755    | -6.533      | 4.816      | 0.028 |
| High school / technical secondary school |  | -0.480  | -45.449     | 44.488      | 0.000      | 0.983 |
| College degree or above                  |  | Ref.    |             |             |            |       |
| Family monthly per capita income         |  |         |             |             |            |       |
| < 5000                                   |  | -2.374  | -55.033     | 50.284      | 0.008      | 0.930 |
| 5000–9999                                |  | -27.067 | -76.448     | 22.315      | 1.154      | 0.283 |
| ≥10000                                   |  | Ref.    |             |             |            |       |
| Cities                                   |  |         |             |             |            |       |
| First-tier                               |  | -10.384 | -65.114     | 44.345      | 0.138      | 0.710 |
| New first-tier                           |  | -37.976 | -89.969     | 14.016      | 2.049      | 0.152 |
| Second-tier                              |  | 1.124   | -49.498     | 51.746      | 0.002      | 0.965 |
| Third- or fourth-tier                    |  | Ref.    |             |             |            |       |
| Pre-pregnancy BMI                        |  |         |             |             |            |       |
| Underweight                              |  | 55.590  | -15.391     | 126.570     | 2.356      | 0.125 |
| Normal                                   |  | 1.115   | -43.579     | 45.810      | 0.002      | 0.961 |
| Overweight/obesity                       |  | Ref.    |             |             |            |       |
| Gravidity                                |  |         |             |             |            |       |
| 1                                        |  | 6.232   | -42.601     | 55.066      | 0.063      | 0.802 |
| ≥2                                       |  | Ref.    |             |             |            |       |
| Parity                                   |  |         |             |             |            |       |
| 0                                        |  | -30.540 | -83.732     | 22.653      | 1.266      | 0.260 |
| ≥1                                       |  | Ref.    |             |             |            |       |

(s) Iron(mg)

| Variables   |  | β      | 95% CI      |             | Wald value | P     |
|-------------|--|--------|-------------|-------------|------------|-------|
|             |  |        | Lower Limit | Upper Limit |            |       |
| NVP group   |  |        |             |             |            |       |
| NVP         |  | -6.729 | -11.502     | -1.956      | 7.634      | 0.006 |
| Non-NVP     |  | Ref.   |             |             |            |       |
| Age (years) |  |        |             |             |            |       |

|                                  |                                          |        |        |        |       |       |
|----------------------------------|------------------------------------------|--------|--------|--------|-------|-------|
|                                  | < 30                                     | -2.896 | -6.888 | 1.096  | 2.022 | 0.155 |
|                                  | ≥30                                      | Ref.   |        |        |       |       |
| Education                        |                                          |        |        |        |       |       |
|                                  | Junior high school or below              | -2.826 | -8.250 | 2.598  | 1.043 | 0.307 |
|                                  | High school / technical secondary school | 0.288  | -4.178 | 4.754  | 0.016 | 0.899 |
|                                  | College degree or above                  | Ref.   |        |        |       |       |
| Family monthly per capita income |                                          |        |        |        |       |       |
|                                  | < 5000                                   | -1.125 | -6.355 | 4.104  | 0.178 | 0.673 |
|                                  | 5000–9999                                | -3.649 | -8.554 | 1.255  | 2.127 | 0.145 |
|                                  | ≥10000                                   | Ref.   |        |        |       |       |
| Cities                           |                                          |        |        |        |       |       |
|                                  | First-tier                               | -1.552 | -6.987 | 3.883  | 0.313 | 0.576 |
|                                  | New first-tier                           | 0.411  | -4.753 | 5.574  | 0.024 | 0.876 |
|                                  | Second-tier                              | 1.569  | -3.458 | 6.597  | 0.374 | 0.541 |
|                                  | Third- or fourth-tier                    | Ref.   |        |        |       |       |
| Pre-pregnancy BMI                |                                          |        |        |        |       |       |
|                                  | Underweight                              | 4.112  | -2.937 | 11.162 | 1.307 | 0.253 |
|                                  | Normal                                   | 0.656  | -3.783 | 5.094  | 0.084 | 0.772 |
|                                  | Overweight/obesity                       | Ref.   |        |        |       |       |
| Gravidity                        |                                          |        |        |        |       |       |
|                                  | 1                                        | -1.017 | -5.867 | 3.833  | 0.169 | 0.681 |
|                                  | ≥2                                       | Ref.   |        |        |       |       |
| Parity                           |                                          |        |        |        |       |       |
|                                  | 0                                        | 0.804  | -4.478 | 6.087  | 0.089 | 0.765 |
|                                  | ≥1                                       | Ref.   |        |        |       |       |

(t) Zinc(mg)

| Variables                        |                                          | β      | 95% CI      |             | Wald value | P     |
|----------------------------------|------------------------------------------|--------|-------------|-------------|------------|-------|
|                                  |                                          |        | Lower Limit | Upper Limit |            |       |
| NVP group                        |                                          |        |             |             |            |       |
|                                  | NVP                                      | -2.150 | -3.465      | -0.835      | 10.264     | 0.001 |
|                                  | Non-NVP                                  | Ref.   |             |             |            |       |
| Age (years)                      |                                          |        |             |             |            |       |
|                                  | < 30                                     | 0.247  | -0.853      | 1.347       | 0.193      | 0.660 |
|                                  | ≥30                                      | Ref.   |             |             |            |       |
| Education                        |                                          |        |             |             |            |       |
|                                  | Junior high school or below              | -1.656 | -3.150      | -0.162      | 4.717      | 0.030 |
|                                  | High school / technical secondary school | -0.531 | -1.762      | 0.699       | 0.716      | 0.397 |
|                                  | College degree or above                  | Ref.   |             |             |            |       |
| Family monthly per capita income |                                          |        |             |             |            |       |
|                                  | < 5000                                   | -1.149 | -2.590      | 0.292       | 2.442      | 0.118 |
|                                  | 5000–9999                                | -1.026 | -2.377      | 0.325       | 2.215      | 0.137 |
|                                  | ≥10000                                   | Ref.   |             |             |            |       |



|                   |                       |        |        |       |       |       |
|-------------------|-----------------------|--------|--------|-------|-------|-------|
| Cities            |                       |        |        |       |       |       |
|                   | First-tier            | -0.286 | -1.783 | 1.212 | 0.140 | 0.708 |
|                   | New first-tier        | -0.735 | -2.158 | 0.688 | 1.025 | 0.311 |
|                   | Second-tier           | 0.621  | -0.764 | 2.006 | 0.772 | 0.380 |
|                   | Third- or fourth-tier | Ref.   |        |       |       |       |
| Pre-pregnancy BMI |                       |        |        |       |       |       |
|                   | Underweight           | 1.219  | -0.723 | 3.161 | 1.513 | 0.219 |
|                   | Normal                | -0.500 | -1.723 | 0.723 | 0.643 | 0.423 |
|                   | Overweight/obesity    | Ref.   |        |       |       |       |
| Gravidity         |                       |        |        |       |       |       |
|                   | 1                     | 0.074  | -1.263 | 1.410 | 0.012 | 0.914 |
|                   | ≥2                    | Ref.   |        |       |       |       |
| Parity            |                       |        |        |       |       |       |
|                   | 0                     | -0.908 | -2.364 | 0.547 | 1.496 | 0.221 |
|                   | ≥1                    | Ref.   |        |       |       |       |

(u) Selenium (mg)

| Variables                        |                                          | β       | 95% CI      |             | Wald value | P     |
|----------------------------------|------------------------------------------|---------|-------------|-------------|------------|-------|
|                                  |                                          |         | Lower Limit | Upper Limit |            |       |
| NVP group                        |                                          |         |             |             |            |       |
|                                  | NVP                                      | -14.882 | -28.265     | -1.499      | 4.750      | 0.029 |
|                                  | Non-NVP                                  | Ref.    |             |             |            |       |
| Age (years)                      |                                          |         |             |             |            |       |
|                                  | < 30                                     | 2.789   | -8.403      | 13.981      | 0.239      | 0.625 |
|                                  | ≥30                                      | Ref.    |             |             |            |       |
| Education                        |                                          |         |             |             |            |       |
|                                  | Junior high school or below              | -8.605  | -23.812     | 6.601       | 1.230      | 0.267 |
|                                  | High school / technical secondary school | -3.039  | -15.561     | 9.482       | 0.226      | 0.634 |
|                                  | College degree or above                  | Ref.    |             |             |            |       |
| Family monthly per capita income |                                          |         |             |             |            |       |
|                                  | < 5000                                   | -10.125 | -24.788     | 4.538       | 1.832      | 0.176 |
|                                  | 5000–9999                                | -9.846  | -23.596     | 3.905       | 1.970      | 0.160 |
|                                  | ≥10000                                   | Ref.    |             |             |            |       |
| Cities                           |                                          |         |             |             |            |       |
|                                  | First-tier                               | 0.467   | -14.773     | 15.706      | 0.004      | 0.952 |
|                                  | New first-tier                           | 0.925   | -13.552     | 15.403      | 0.016      | 0.900 |
|                                  | Second-tier                              | -4.175  | -18.271     | 9.921       | 0.337      | 0.562 |
|                                  | Third- or fourth-tier                    | Ref.    |             |             |            |       |
| Pre-pregnancy BMI                |                                          |         |             |             |            |       |
|                                  | Underweight                              | 15.740  | -4.024      | 35.505      | 2.436      | 0.119 |
|                                  | Normal                                   | 1.279   | -11.167     | 13.724      | 0.041      | 0.840 |
|                                  | Overweight/obesity                       | Ref.    |             |             |            |       |
| Gravidity                        |                                          |         |             |             |            |       |

|        |    |         |         |        |       |       |
|--------|----|---------|---------|--------|-------|-------|
| Parity | 1  | 2.262   | -11.336 | 15.860 | 0.106 | 0.744 |
|        | ≥2 | Ref.    |         |        |       |       |
|        | 0  | -15.523 | -30.334 | -0.711 | 4.219 | 0.040 |
|        | ≥1 | Ref.    |         |        |       |       |

(v) Copper (mg)

| Variables                                |  | β      | 95% CI      |             | Wald value | P     |
|------------------------------------------|--|--------|-------------|-------------|------------|-------|
|                                          |  |        | Lower Limit | Upper Limit |            |       |
| NVP group                                |  |        |             |             |            |       |
| NVP                                      |  | -0.295 | -0.949      | 0.359       | 0.781      | 0.377 |
| Non-NVP                                  |  | Ref.   |             |             |            |       |
| Age (years)                              |  |        |             |             |            |       |
| < 30                                     |  | 0.164  | -0.383      | 0.711       | 0.346      | 0.556 |
| ≥30                                      |  | Ref.   |             |             |            |       |
| Education                                |  |        |             |             |            |       |
| Junior high school or below              |  | -0.633 | -1.377      | 0.110       | 2.789      | 0.095 |
| High school / technical secondary school |  | 0.221  | -0.391      | 0.834       | 0.503      | 0.478 |
| College degree or above                  |  | Ref.   |             |             |            |       |
| Family monthly per capita income         |  |        |             |             |            |       |
| < 5000                                   |  | -0.072 | -0.789      | 0.645       | 0.039      | 0.844 |
| 5000–9999                                |  | 0.121  | -0.551      | 0.793       | 0.125      | 0.724 |
| ≥10000                                   |  | Ref.   |             |             |            |       |
| Cities                                   |  |        |             |             |            |       |
| First-tier                               |  | -0.292 | -1.037      | 0.453       | 0.589      | 0.443 |
| New first-tier                           |  | 0.422  | -0.286      | 1.129       | 1.363      | 0.243 |
| Second-tier                              |  | 0.110  | -0.579      | 0.799       | 0.097      | 0.755 |
| Third- or fourth-tier                    |  | Ref.   |             |             |            |       |
| Pre-pregnancy BMI                        |  |        |             |             |            |       |
| Underweight                              |  | 0.628  | -0.338      | 1.594       | 1.622      | 0.203 |
| Normal                                   |  | 0.298  | -0.310      | 0.907       | 0.924      | 0.336 |
| Overweight/obesity                       |  | Ref.   |             |             |            |       |
| Gravidity                                |  |        |             |             |            |       |
| 1                                        |  | 0.249  | -0.415      | 0.914       | 0.540      | 0.462 |
| ≥2                                       |  | Ref.   |             |             |            |       |
| Parity                                   |  |        |             |             |            |       |
| 0                                        |  | -0.837 | -1.561      | -0.113      | 5.139      | 0.023 |
| ≥1                                       |  | Ref.   |             |             |            |       |

(w) Manganese (mg)

| Variables |  | β | 95% CI      |             | Wald value | P |
|-----------|--|---|-------------|-------------|------------|---|
|           |  |   | Lower Limit | Upper Limit |            |   |
| NVP group |  |   |             |             |            |   |

|                                  |                                          |        |        |       |       |       |
|----------------------------------|------------------------------------------|--------|--------|-------|-------|-------|
|                                  | NVP                                      | -0.560 | -2.373 | 1.252 | 0.367 | 0.545 |
|                                  | Non-NVP                                  | Ref.   |        |       |       |       |
| Age (years)                      |                                          |        |        |       |       |       |
|                                  | < 30                                     | -1.185 | -2.701 | 0.331 | 2.346 | 0.126 |
|                                  | ≥30                                      | Ref.   |        |       |       |       |
| Education                        |                                          |        |        |       |       |       |
|                                  | Junior high school or below              | -0.397 | -2.457 | 1.663 | 0.143 | 0.706 |
|                                  | High school / technical secondary school | 0.154  | -1.543 | 1.850 | 0.031 | 0.859 |
|                                  | College degree or above                  | Ref.   |        |       |       |       |
| Family monthly per capita income |                                          |        |        |       |       |       |
|                                  | < 5000                                   | -0.636 | -2.622 | 1.350 | 0.394 | 0.530 |
|                                  | 5000–9999                                | -0.740 | -2.603 | 1.122 | 0.607 | 0.436 |
|                                  | ≥10000                                   | Ref.   |        |       |       |       |
| Cities                           |                                          |        |        |       |       |       |
|                                  | First-tier                               | 0.904  | -1.160 | 2.968 | 0.737 | 0.391 |
|                                  | New first-tier                           | -0.138 | -2.099 | 1.823 | 0.019 | 0.890 |
|                                  | Second-tier                              | 0.662  | -1.247 | 2.572 | 0.462 | 0.497 |
|                                  | Third- or fourth-tier                    | Ref.   |        |       |       |       |
| Pre-pregnancy BMI                |                                          |        |        |       |       |       |
|                                  | Underweight                              | 0.828  | -1.849 | 3.505 | 0.367 | 0.544 |
|                                  | Normal                                   | 0.680  | -1.006 | 2.366 | 0.625 | 0.429 |
|                                  | Overweight/obesity                       | Ref.   |        |       |       |       |
| Gravidity                        |                                          |        |        |       |       |       |
|                                  | 1                                        | -0.775 | -2.617 | 1.067 | 0.680 | 0.410 |
|                                  | ≥2                                       | Ref.   |        |       |       |       |
| Parity                           |                                          |        |        |       |       |       |
|                                  | 0                                        | 0.010  | -1.996 | 2.016 | 0.000 | 0.992 |
|                                  | ≥1                                       | Ref.   |        |       |       |       |

Table S3 Comparison of dietary nutrient intake of pregnant women with different severity of nausea and vomiting

|               | Non-NVP               | Mild NVP                     |                  | Moderate NVP                 |                | Severe NVP                  |                  | Spearman's P        |
|---------------|-----------------------|------------------------------|------------------|------------------------------|----------------|-----------------------------|------------------|---------------------|
|               | Median(P25,P75)       | Median(P25,P75)              | P <sup>a</sup>   | Median(P25,P75)              | P <sup>a</sup> | Median(P25,P75)             | P <sup>a</sup>   |                     |
| Energy        | 1897.7(1449.5,2390.7) | 1699.5(1354.7,2115.5)        | 0.069            | <b>1539.9(1201.3,1932.2)</b> | <b>0.006</b>   | <b>1230.5(774.5,1897.1)</b> | <b>0.001</b>     | <b>&lt;0.001***</b> |
| Protein       | 63.4(42,86)           | 51.6(37.7,70.7)              | 0.094            | <b>49.9(35.8,63.3)</b>       | <b>0.040</b>   | <b>42.4(22.7,66.9)</b>      | <b>0.011</b>     | <b>0.004**</b>      |
| Fat           | 77.9(58,102.5)        | <b>55.9(42.1,75.9)</b>       | <b>&lt;0.001</b> | <b>56.5(40.8,79.8)</b>       | <b>0.004</b>   | <b>49.9(29.9,70.7)</b>      | <b>0.001</b>     | <b>0.001**</b>      |
| Carbohydrate  | 220.6(167,279.9)      | 230(171.1,299)               | 0.875            | 185.1(132.8,269.8)           | 0.102          | <b>147.8(91.5,273.5)</b>    | <b>0.013</b>     | <b>0.004**</b>      |
| Dietary fiber | 8.6(6.1,14.7)         | 9.1(5.8,13.1)                | 0.726            | 10.5(5.2,14.3)               | 0.881          | <b>6.5(3.9,10.3)</b>        | <b>0.029</b>     | 0.174               |
| Cholesterol   | 428(112.4,768)        | 349.8(73.8,583.2)            | 0.167            | <b>301(94.4,452.3)</b>       | <b>0.049</b>   | 309.4(67.5,562.6)           | 0.164            | 0.054               |
| Vitamin A     | 399.7(175.5,603.9)    | 291.9(132.8,472.7)           | 0.061            | 273.5(150.8,427)             | 0.067          | <b>222.4(74,350.2)</b>      | <b>0.015</b>     | <b>0.021*</b>       |
| Thiamin       | 0.8(0.6,1)            | <b>0.7(0.4,1)</b>            | <b>0.034</b>     | <b>0.6(0.4,0.9)</b>          | <b>0.018</b>   | <b>0.5(0.4,0.7)</b>         | <b>&lt;0.001</b> | <b>0.001**</b>      |
| Riboflavin    | 0.7(0.5,1.2)          | <b>0.6(0.5,0.8)</b>          | <b>0.020</b>     | 0.7(0.5,0.9)                 | 0.103          | <b>0.4(0.3,0.7)</b>         | <b>0.001</b>     | <b>0.004**</b>      |
| Niacin        | 10.9(6.4,16.3)        | 10.1(7,14.6)                 | 0.671            | 9.1(6.6,12.9)                | 0.273          | 8.7(6.7,10.9)               | 0.063            | <b>0.039*</b>       |
| Vitamin C     | 58(29.6,107.1)        | 56.9(27.5,98.5)              | 0.648            | 49.1(22.9,98.8)              | 0.568          | 36.6(16.1,96.7)             | 0.246            | 0.276               |
| Vitamin E     | 31.1(20.9,47.8)       | <b>22.4(15.1,34.8)</b>       | <b>0.002</b>     | 24.1(17.1,37.7)              | 0.052          | <b>19.2(14.5,31.7)</b>      | <b>0.001</b>     | <b>0.019*</b>       |
| Folate        | 224.8(138.8,347.1)    | 216.7(150.1,308.4)           | 0.592            | 193.6(135.4,300.9)           | 0.347          | 173.1(126.2,279.7)          | 0.145            | 0.134               |
| Calcium       | 375.7(218.6,796.7)    | 324.3(213.5,515.8)           | 0.137            | 292.6(184,599.4)             | 0.183          | <b>208.4(108.1,510.1)</b>   | <b>0.018</b>     | <b>0.022*</b>       |
| Phosphorus    | 816.2(667.3,1315.5)   | <b>744.2(569.3,1043.1)</b>   | <b>0.047</b>     | 747.7(541.8,999.1)           | 0.06           | <b>534.7(370.1,849.7)</b>   | <b>0.001</b>     | <b>0.001**</b>      |
| Potassium     | 1816.2(1314.5,2975.2) | <b>1538.1(1125.3,2043.6)</b> | <b>0.048</b>     | 1719.9(1096.2,2309.6)        | 0.396          | <b>1103.1(763.1,1737.8)</b> | <b>0.005</b>     | <b>0.035*</b>       |
| Sodium        | 4132.5(3532.8,5237.1) | 3995.3(3087.7,4965.6)        | 0.130            | 4045.8(3192.5,4769.1)        | 0.187          | 3700.3(2620.1,4834.2)       | 0.126            | 0.129               |
| Magnesium     | 252.4(178.1,305.1)    | 227.1(174.9,309.1)           | 0.328            | 229.4(170.5,311.3)           | 0.586          | 182.1(121.4,284.9)          | 0.052            | 0.12                |
| Iron          | 15.3(11.4,20.8)       | 13.6(9.7,18.8)               | 0.086            | 12.6(9.1,18.1)               | 0.05           | <b>9.7(5.5,17.3)</b>        | <b>0.001</b>     | <b>0.001**</b>      |
| Zinc          | 8(6,12.9)             | 7(5.1,10.2)                  | 0.093            | <b>6.7(4.8,8.7)</b>          | <b>0.021</b>   | <b>5.2(3.5,8.6)</b>         | <b>0.004</b>     | <b>0.001**</b>      |
| Selenium      | 33.8(24.1,58.3)       | 32.1(20.8,44.1)              | 0.174            | 28.1(23,44.6)                | 0.078          | <b>19.6(10.4,45)</b>        | <b>0.016</b>     | <b>0.011*</b>       |
| Copper        | 1.4(1,2.3)            | 1.3(0.9,1.8)                 | 0.235            | 1.3(0.9,2.1)                 | 0.524          | 1(0.6,1.9)                  | 0.153            | 0.275               |
| Manganese     | 3.1(2.3,3.9)          | 2.7(2,4.1)                   | 0.524            | 2.7(1.8,4.4)                 | 0.396          | <b>2.3(1.6,3.4)</b>         | <b>0.021</b>     | <b>0.049*</b>       |

<sup>a</sup> Compared to the non-NVP group.

\*  $P < 0.05$ ; \*\*  $P < 0.01$ ; \*\*\*  $P < 0.001$

NVP: Nausea and vomiting in pregnancy;

Table S4 Comparison of dietary nutrient intake of pregnant women with different severity of nausea and vomiting after adjusting for demographic characteristics

|                        | Non-NVP | Mild NVP                              |              | Moderate NVP                          |              | Severe NVP                            |                  |
|------------------------|---------|---------------------------------------|--------------|---------------------------------------|--------------|---------------------------------------|------------------|
|                        |         | Adjusted $\beta$ (95%CI) <sup>a</sup> | P            | Adjusted $\beta$ (95%CI) <sup>a</sup> | P            | Adjusted $\beta$ (95%CI) <sup>a</sup> | P                |
| Energy(kcal)           | Ref.    | -216.3(-436.9,4.2)                    | 0.055        | <b>-336.9(-585,-88.9)**</b>           | <b>0.008</b> | <b>-585.8(-891.4,-280.3)***</b>       | <b>&lt;0.001</b> |
| Protein(g)             | Ref.    | <b>-15.9(-26.9,-4.8)**</b>            | <b>0.005</b> | <b>-20.7(-33.1,-8.3)**</b>            | <b>0.001</b> | <b>-25.9(-41.2,-10.6)**</b>           | <b>0.001</b>     |
| Fat(g)                 | Ref.    | <b>-15(-24.7,-5.2)**</b>              | <b>0.003</b> | <b>-15.6(-26.6,-4.6)**</b>            | <b>0.005</b> | <b>-24.7(-38.2,-11.1)***</b>          | <b>&lt;0.001</b> |
| Carbohydrate(g)        | Ref.    | -13.2(-46.7,20.3)                     | 0.440        | -34.4(-72.1,3.3)                      | 0.073        | <b>-61.8(-108.2,-15.3)**</b>          | <b>0.009</b>     |
| Dietary fiber(g)       | Ref.    | -2.5(-5.4,0.3)                        | 0.079        | -2(-5.2,1.2)                          | 0.218        | -3.9(-7.8,0.1)                        | 0.054            |
| Cholesterol(mg)        | Ref.    | -59.4(-174.9,56.2)                    | 0.314        | <b>-131.7(-261.6,-1.7)*</b>           | <b>0.047</b> | -116.9(-277,43.2)                     | 0.152            |
| Vitamin A( $\mu$ gREA) | Ref.    | -66.8(-342,208.4)                     | 0.634        | -146.1(-455.6,163.3)                  | 0.355        | -111.6(-492.8,269.6)                  | 0.566            |
| Thiamin(mg)            | Ref.    | <b>-0.2(-0.3,0)*</b>                  | <b>0.027</b> | <b>-0.2(-0.4,0)*</b>                  | <b>0.013</b> | <b>-0.3(-0.5,-0.1)**</b>              | <b>0.004</b>     |
| Riboflavin(mg)         | Ref.    | <b>-0.3(-0.5,-0.1)**</b>              | <b>0.001</b> | <b>-0.3(-0.5,-0.1)**</b>              | <b>0.005</b> | <b>-0.5(-0.7,-0.2)**</b>              | <b>0.001</b>     |
| Niacin(mg)             | Ref.    | -1.5(-4.2,1.2)                        | 0.281        | -1.5(-4.6,1.5)                        | 0.323        | <b>-4.6(-8.4,-0.8)*</b>               | <b>0.018</b>     |
| Vitamin C(mg)          | Ref.    | 2.8(-36.1,41.6)                       | 0.889        | -2(-45.7,41.8)                        | 0.93         | 27.1(-26.8,81)                        | 0.324            |
| Vitamin E(mg)          | Ref.    | <b>-7(-12.9,-1.1)*</b>                | <b>0.021</b> | -5.3(-12,1.3)                         | 0.116        | <b>-12.4(-20.6,-4.2)**</b>            | <b>0.003</b>     |
| Folate( $\mu$ gDFE)    | Ref.    | -24.9(-79.8,30.1)                     | 0.375        | -53.8(-115.9,8.3)                     | 0.089        | -54.1(-130.2,22)                      | 0.163            |
| Calcium(mg)            | Ref.    | <b>-213.7(-347.1,-80.3)**</b>         | <b>0.002</b> | <b>-179.2(-329.2,-29.1)*</b>          | <b>0.019</b> | <b>-190.8(-375.6,-6)*</b>             | <b>0.043</b>     |
| Phosphorus(mg)         | Ref.    | <b>-233(-375.8,-90.2)**</b>           | <b>0.001</b> | <b>-241.7(-402.3,-81.1)**</b>         | <b>0.003</b> | <b>-395.4(-593.2,-197.6)***</b>       | <b>&lt;0.001</b> |
| Potassium(mg)          | Ref.    | <b>-512(-912.6,-111.4)*</b>           | <b>0.012</b> | -264(-714.5,186.5)                    | 0.251        | <b>-676.2(-1231.1,-121.2)*</b>        | <b>0.017</b>     |
| Sodium(mg)             | Ref.    | -197.5(-797.1,402.1)                  | 0.519        | -209.2(-883.5,465.1)                  | 0.543        | -463(-1293.5,367.6)                   | 0.275            |
| Magnesium(mg)          | Ref.    | -46.5(-97.1,4.1)                      | 0.072        | -19.2(-76.1,37.7)                     | 0.509        | -60.4(-130.5,9.7)                     | 0.091            |
| Iron(mg)               | Ref.    | <b>-6.2(-11.2,-1.1)*</b>              | <b>0.016</b> | <b>-6.4(-12,-0.7)*</b>                | <b>0.027</b> | <b>-9.9(-16.9,-3)**</b>               | <b>0.005</b>     |

|               |      |                         |              |                           |              |                           |              |
|---------------|------|-------------------------|--------------|---------------------------|--------------|---------------------------|--------------|
| Zinc(mg)      | Ref. | <b>-1.8(-3.2,-0.4)*</b> | <b>0.011</b> | <b>-2.4(-3.9,-0.8)**</b>  | <b>0.003</b> | <b>-3.3(-5.2,-1.4)**</b>  | <b>0.001</b> |
| Selenium(mg)  | Ref. | -12.5(-26.6,1.6)        | 0.083        | <b>-16.6(-32.5,-0.7)*</b> | <b>0.040</b> | <b>-21.8(-41.4,-2.3)*</b> | <b>0.028</b> |
| Copper(mg)    | Ref. | -0.2(-0.8,0.5)          | 0.660        | -0.4(-1.2,0.4)            | 0.323        | -0.7(-1.7,0.2)            | 0.145        |
| Manganese(mg) | Ref. | -1.1(-3,0.8)            | 0.265        | 1(-1.1,3.1)               | 0.358        | -1.7(-4.3,1)              | 0.213        |

<sup>a</sup> Adjustment factors include age, education, income, city, pre-pregnancy BMI, gravidity and parity.

\*  $P < 0.05$ ; \*\*  $P < 0.01$ ; \*\*\*  $P < 0.001$

NVP: Nausea and vomiting in pregnancy;

Table S5 Comparison of average daily food intake of pregnant women with different severities of nausea and vomiting.

|                                  | Non-NVP            | Mild NVP               |                | Moderate NVP            |                  | Severe NVP              |                | Spearman's P        |
|----------------------------------|--------------------|------------------------|----------------|-------------------------|------------------|-------------------------|----------------|---------------------|
|                                  | Median(P25,P75)    | Median(P25,P75)        | P <sup>a</sup> | Median(P25,P75)         | P <sup>a</sup>   | Median(P25,P75)         | P <sup>a</sup> |                     |
| Cereals                          | 198.0(120.4,289)   | 238(122.5,349.7)       | 0.23           | 182.1(102.3,272.9)      | 0.416            | 176.7(111.3,295.1)      | 0.715          | 0.181               |
| Potatoes                         | 32.7(14.0,70.0)    | 23.3(7.9,52.5)         | 0.103          | 23.3(6.7,55.0)          | 0.145            | 14.0(0.0,89.3)          | 0.218          | 0.146               |
| Fresh vegetables                 | 160(58.3,300.0)    | 140(60,250)            | 0.408          | 150.0(54.2,232.5)       | 0.426            | <b>75.0(21.7,200.0)</b> | <b>0.030</b>   | 0.053               |
| Pickled and fermented vegetables | 0.3(0.0,4.7)       | 0.1(0.0,4.7)           | 0.467          | 0.2(0.0,3.3)            | 0.348            | 0.1(0.0,2.3)            | 0.346          | 0.300               |
| Mushroom and algae               | 11.7(4.1,20.1)     | 7.2(1.7,19.0)          | 0.072          | <b>5.7(0.9,13.7)</b>    | <b>0.019</b>     | 6.6(2.4,28.9)           | 0.355          | 0.110               |
| Soybeans and their products      | 20.0(8.2,48.0)     | 18.9(6.7,46.2)         | 0.658          | 12.5(3.9,35.0)          | 0.12             | 20.6(11.3,35.7)         | 0.773          | 0.213               |
| Nuts and seeds                   | 22.7(7.9,40.0)     | <b>11.7(1.3,26.5)</b>  | <b>0.005</b>   | <b>9.3(1.1,21.9)</b>    | <b>&lt;0.001</b> | 14.5(1.6,25.0)          | 0.054          | <b>0.004**</b>      |
| Fruits                           | 300.0(200.0,500.0) | 250.0(152.5,400)       | 0.189          | 260(150.0,400.0)        | 0.188            | 300.0(180.0,500.0)      | 0.797          | 0.551               |
| Poultry meat                     | 38.5(14.2,97.5)    | <b>30.0(4.7,50.0)</b>  | <b>0.049</b>   | <b>11.7(0.0,37.5)</b>   | <b>&lt;0.001</b> | <b>6.4(0.0,52.5)</b>    | <b>0.002</b>   | <b>&lt;0.001***</b> |
| Livestock meat                   | 11.0(3.3,43.8)     | 11.7(0.0,28.9)         | 0.314          | <b>5.3(0.0,23.3)</b>    | <b>0.028</b>     | <b>1.7(0.0,16.6)</b>    | <b>0.004</b>   | <b>0.002**</b>      |
| Aquatic products                 | 14.6(3.8,68.8)     | 16.3(3.3,35.0)         | 0.434          | 10.8(1.0,23.3)          | 0.077            | 8.2(0.0,50.6)           | 0.242          | <b>0.039*</b>       |
| Eggs                             | 60.0(46.4,60.0)    | <b>50.0(21.0,60.0)</b> | <b>0.013</b>   | <b>45.3(18.4,60.0)</b>  | <b>0.022</b>     | <b>49.0(9.4,60.0)</b>   | <b>0.037</b>   | <b>0.026*</b>       |
| Dairy products                   | 250.0(101.3,295.4) | 200.0(61.7,291.7)      | 0.267          | <b>91.3(11.7,250.0)</b> | <b>0.006</b>     | <b>46.7(0.0,225.0)</b>  | <b>0.002</b>   | <b>&lt;0.001***</b> |
| Soups                            | 44.2(0.0,186.7)    | 43.3(0.0,116.7)        | 0.427          | 23.3(0.0,93.3)          | 0.124            | 93.3(5.2,140)           | 0.811          | 0.506               |
| Snacks and beverages             | 5.0(0.0,46.8)      | 1.4(0.0,24.3)          | 0.217          | 1.2(0.0,16.7)           | 0.134            | 5.8(0.0,32.4)           | 0.880          | 0.586               |

<sup>a</sup> Compared to the non-NVP group.

\*  $P < 0.05$ ; \*\*  $P < 0.01$ ; \*\*\*  $P < 0.001$

NVP: Nausea and vomiting in pregnancy;

Table S6 Comparison of d average daily food intake of pregnant women with different severity of nausea and vomiting after adjusting for demographic characteristics

|                                  | Non-NVP | Mild NVP                              |              | Moderate NVP                          |                  | Severe NVP                            |              |
|----------------------------------|---------|---------------------------------------|--------------|---------------------------------------|------------------|---------------------------------------|--------------|
|                                  |         | Adjusted $\beta$ (95%CI) <sup>a</sup> | P            | Adjusted $\beta$ (95%CI) <sup>a</sup> | P                | Adjusted $\beta$ (95%CI) <sup>a</sup> | P            |
| Cereals                          | Ref.    | 49.8(-12.5,112.1)                     | 0.117        | -21.2(-90.7,48.2)                     | 0.549            | -8.5(-93.9,76.9)                      | 0.845        |
| Potatoes                         | Ref.    | -5.6(-22.2,10.9)                      | 0.506        | -4.9(-23.4,13.6)                      | 0.605            | 3.6(-19.4,26.6)                       | 0.76         |
| Fresh vegetables                 | Ref.    | -20.9(-98.3,56.6)                     | 0.597        | -38.9(-125.5,47.6)                    | 0.378            | -41.8(-148.4,64.7)                    | 0.442        |
| Pickled and fermented vegetables | Ref.    | -2.4(-6.5,1.7)                        | 0.254        | -3.8(-8.4,0.8)                        | 0.104            | -4.4(-10,1.3)                         | 0.131        |
| Mushroom and algae               | Ref.    | -2.9(-10,4.2)                         | 0.421        | -4.3(-12.2,3.6)                       | 0.284            | 0.3(-9.4,9.9)                         | 0.955        |
| Soybeans and their products      | Ref.    | -7.2(-21.2,6.7)                       | 0.309        | <b>-19.1(-34.9,-3.4)*</b>             | <b>0.017</b>     | -10.2(-29.5,9.1)                      | 0.299        |
| Nuts and seeds                   | Ref.    | <b>-8.9(-17.3,-0.4)*</b>              | <b>0.039</b> | <b>-17.2(-26.7,-7.7)***</b>           | <b>&lt;0.001</b> | <b>-12.3(-23.9,-0.6)*</b>             | <b>0.039</b> |
| Fruits                           | Ref.    | -26.5(-117.2,64.3)                    | 0.568        | -35.2(-137,66.6)                      | 0.498            | -39(-163.9,85.9)                      | 0.54         |
| Poultry meat                     | Ref.    | -10.2(-31.5,11.1)                     | 0.349        | <b>-28.3(-52.2,-4.4)*</b>             | <b>0.020</b>     | <b>-30.7(-60.1,-1.2)*</b>             | <b>0.041</b> |
| Livestock meat                   | Ref.    | -3.7(-15.1,7.8)                       | 0.529        | -12.2(-25,0.6)                        | 0.062            | <b>-18.4(-34.2,-2.6)*</b>             | <b>0.022</b> |
| Aquatic products                 | Ref.    | -3.7(-18.1,10.7)                      | 0.613        | <b>-18(-34.2,-1.9)*</b>               | <b>0.029</b>     | -10.5(-30.4,9.4)                      | 0.299        |
| Eggs                             | Ref.    | -8.6(-19.1,2)                         | 0.112        | -9.5(-21.4,2.4)                       | 0.119            | -11.1(-25.7,3.5)                      | 0.137        |
| Dairy products                   | Ref.    | -18.8(-71.2,33.6)                     | 0.482        | <b>-87.1(-145.6,-28.6)**</b>          | <b>0.004</b>     | <b>-85.7(-158.1,-13.4)*</b>           | <b>0.020</b> |
| Soups                            | Ref.    | -34.1(-71.6,3.5)                      | 0.076        | <b>-46.1(-88.1,-4)*</b>               | <b>0.032</b>     | -13.8(-66.2,38.7)                     | 0.607        |
| Snacks and beverages             | Ref.    | 10.4(-28.1,49)                        | 0.596        | 3.3(-39.9,46.5)                       | 0.881            | -7.5(-60.3,45.4)                      | 0.782        |

<sup>a</sup> Adjustment factors include age, education, income, city, pre-pregnancy BMI, gravidity and parity.

\*  $P < 0.05$ ; \*\*  $P < 0.01$ ; \*\*\*  $P < 0.001$

NVP: Nausea and vomiting in pregnancy;
